# Supplementary material
Source: PubMed Central journal article supplement (PMC5604022)
Supplement: pnas.1707375114.sapp.pdf [file pnas.1707375114.sapp.pdf]

# Supplementary Information: Appendix for Exploring regulation in tissues with eQTL networks.

## Supplementary Figures

|                      |    |
|----------------------|----|
| Figure S1. . . . .   | 2  |
| Figure S2. . . . .   | 3  |
| Figure S3. . . . .   | 4  |
| Figure S4. . . . .   | 5  |
| Figure S5. . . . .   | 6  |
| Figure S6. . . . .   | 7  |
| Figure S7. . . . .   | 8  |
| Figure S8. . . . .   | 9  |
| Figure S9. . . . .   | 10 |
| Figure S10 . . . . . | 11 |
| Figure S11 . . . . . | 12 |

## Supplementary Tables

|                    |    |
|--------------------|----|
| Table S1 . . . . . | 13 |
| Table S2 . . . . . | 13 |

## SI Datasets

**Dataset S1:** Odds ratio and p-values measuring enrichment in each chromatin state for *trans*-eQTLs in each tissue. cf. transeQTLs.epigenomic\_roadmap\_enrichment.csv file.

**Dataset S2:** Proportion of SNPs that are significantly associated to at least one gene depending on FDR. cf. proportion\_eqtls.csv

**Dataset S3:** GO biological processes enrichment for each community in each tissue. cf. GeneOntology\_biological\_processes.csv file.

**Dataset S4:** Association with traits and diseases of SNPs and genes from heart left ventricle community 86 and involved in cellular respiration biological processes. cf. list\_snps\_genes\_heart\_left\_ventricle\_86.csv file.

**Dataset S5:** Enrichment in epigenomics roadmap chromatin states for central SNPs. cf. centrality\_epigenomic\_roadmap\_enrichment.csv file.

## SI Figures

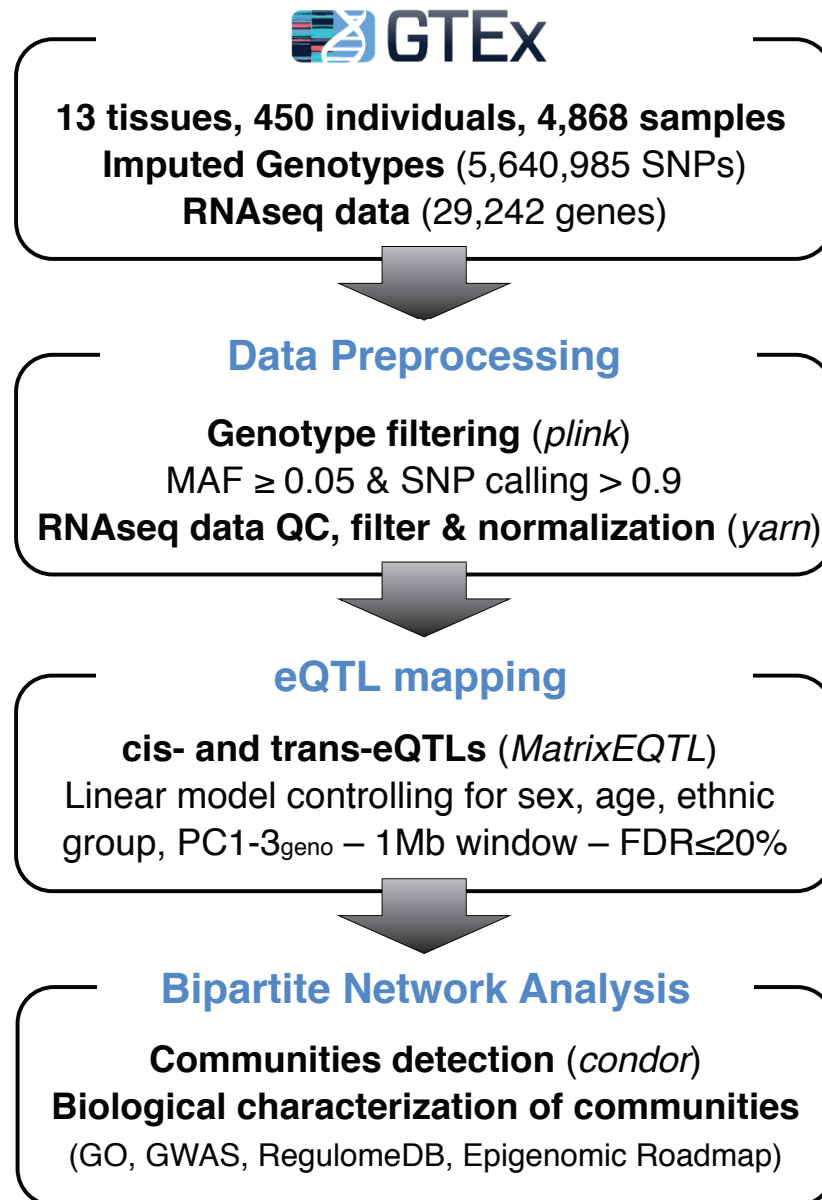

**Figure S1:** Study overview. Principal components 1-3 used as covariates in eQTL mapping are presented in Figure S3. Comparison of our eQTL mapping results with those from the GTEx consortium are presented in Table S2.

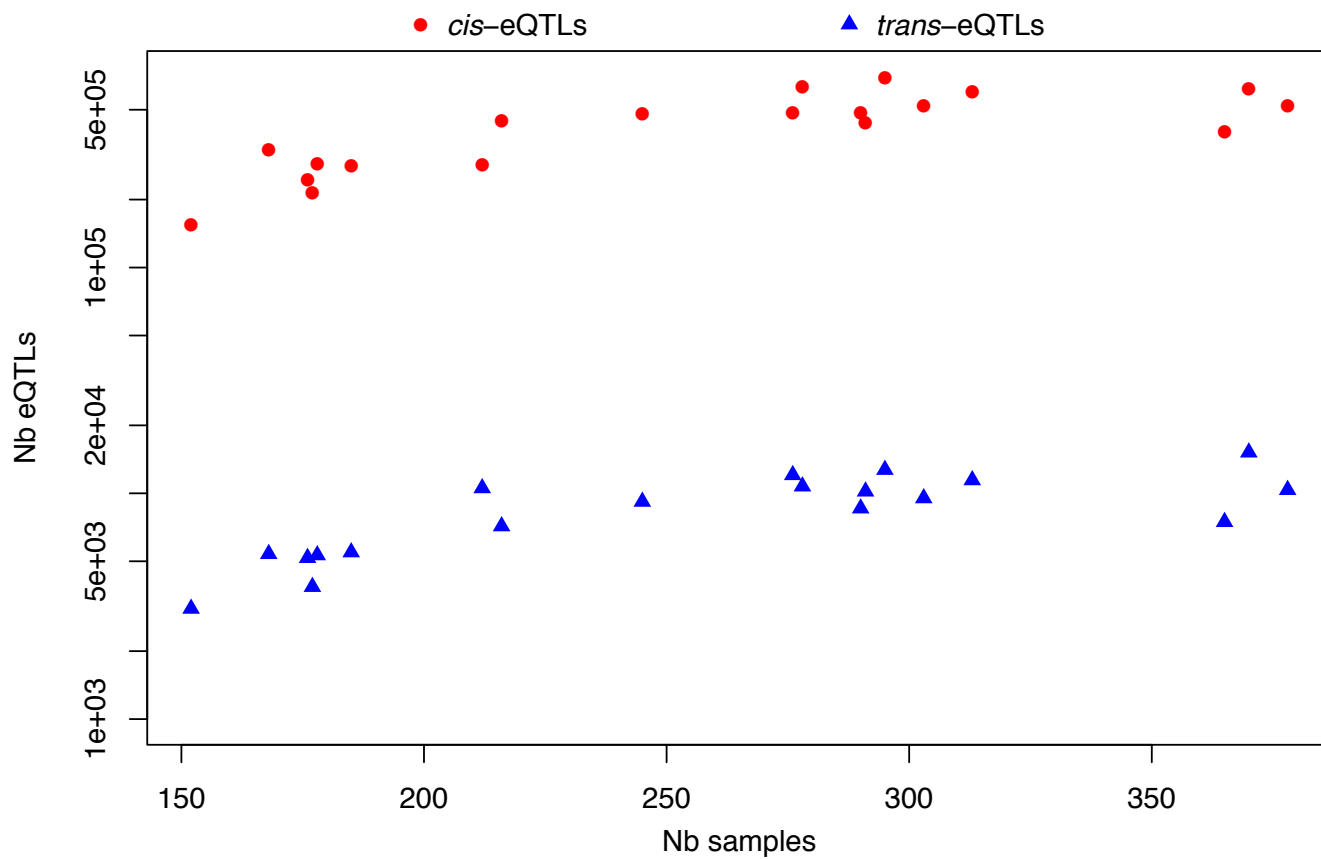

**Figure S2:** Number of *cis*- and *trans*-eQTLs in function of sample size.

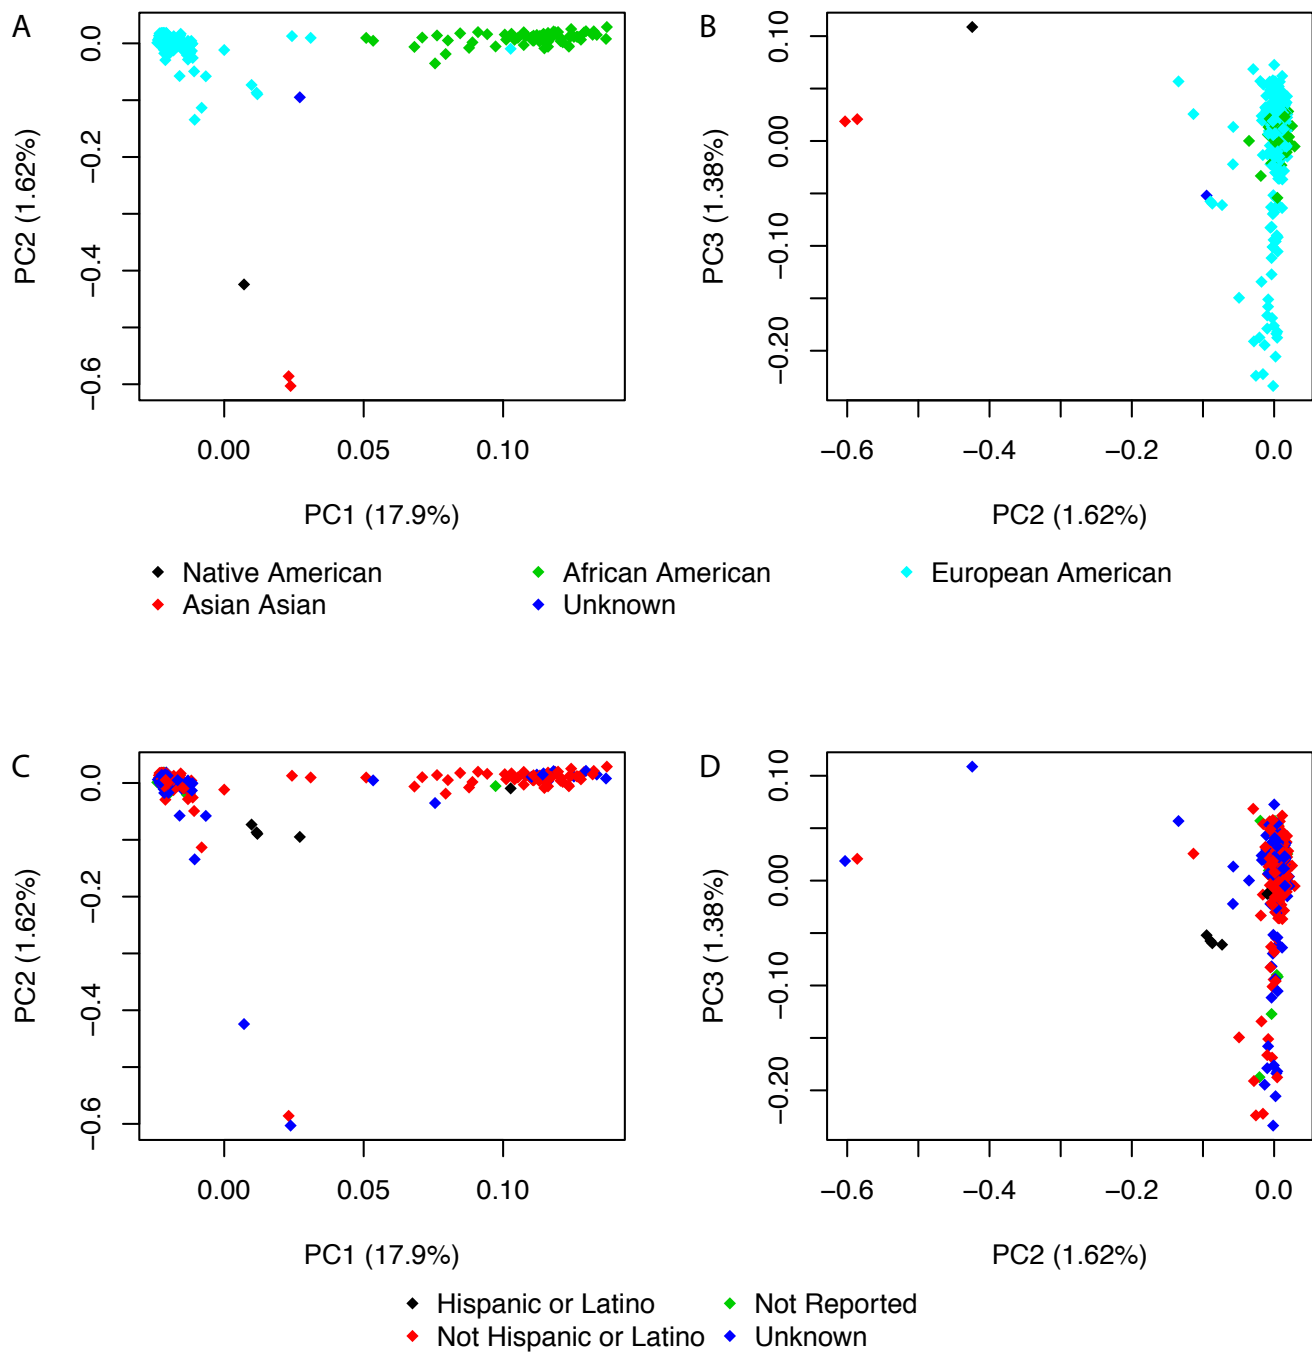

**Figure S3:** Principal component analysis of genotyping data. **A.** and **C.** PC1 vs. PC2. **B.** and **D.** PC2 vs. PC3. **A.** and **B.** Colors represent population. **C.** and **D.** Colors represent ethnicity as reported by donor, family/next of kin, or medical record abstraction.

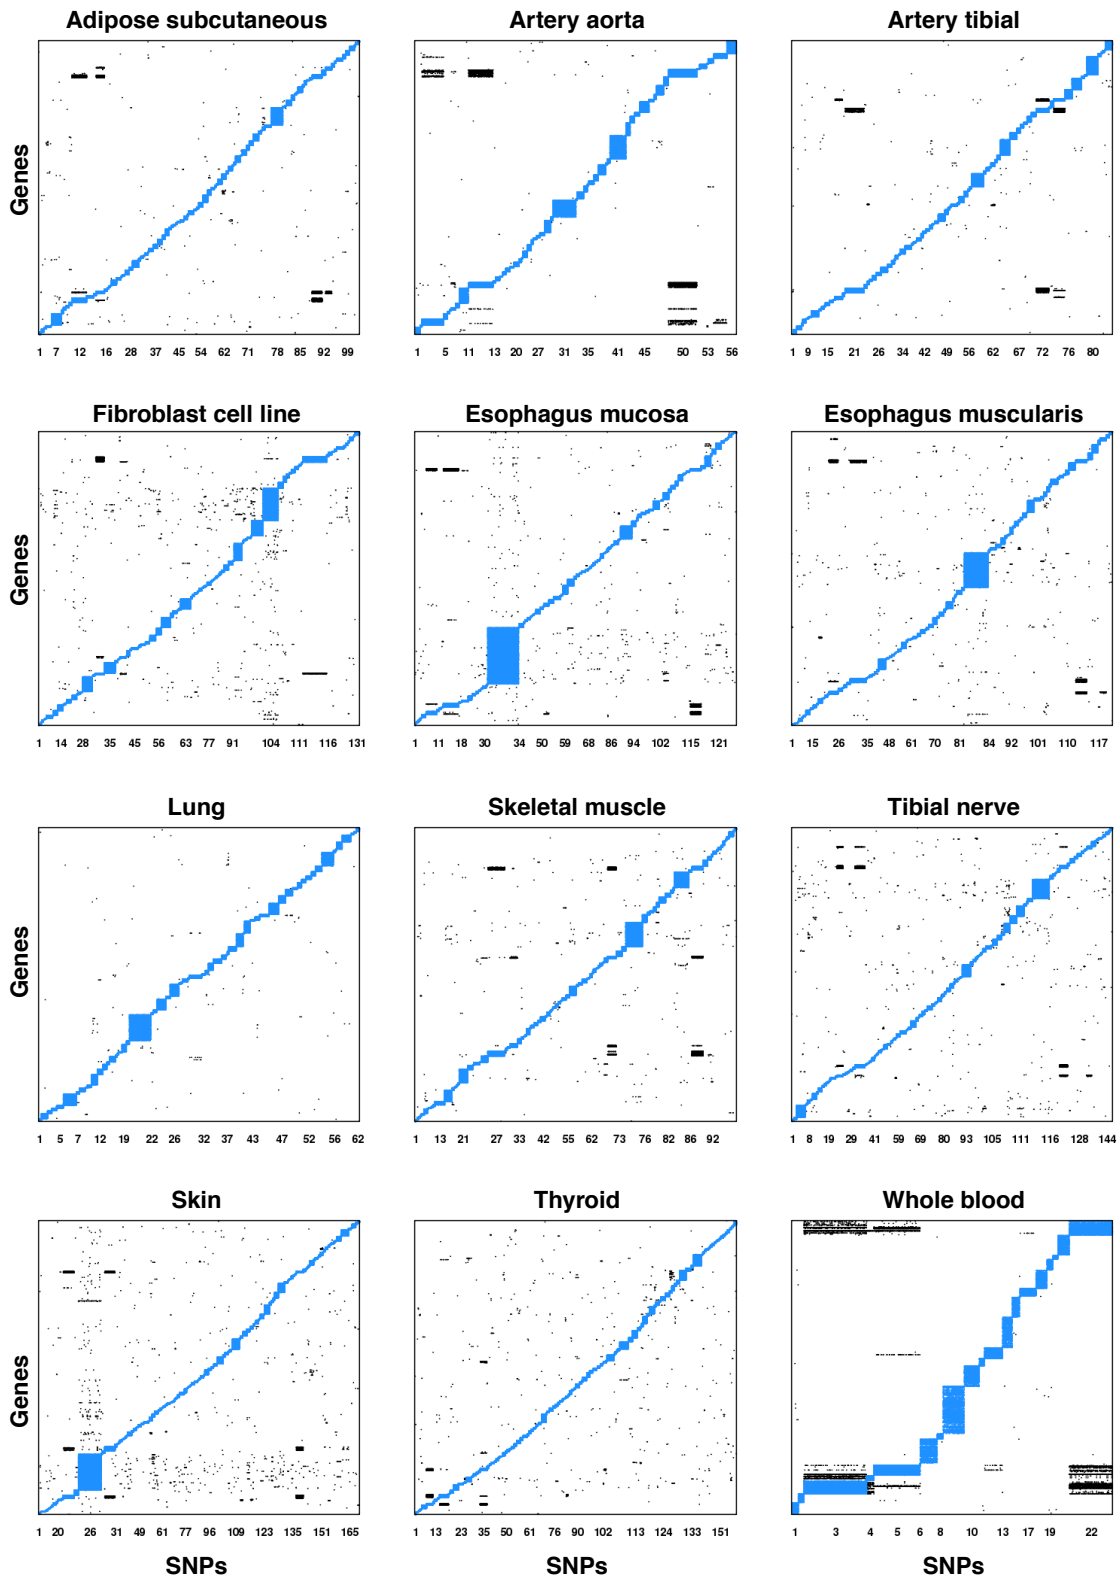

**Figure S4:** Structure of communities within each eQTL network. Each edge is represented by a point. Intra-community edges are plotted in blue, inter-community edges in black.

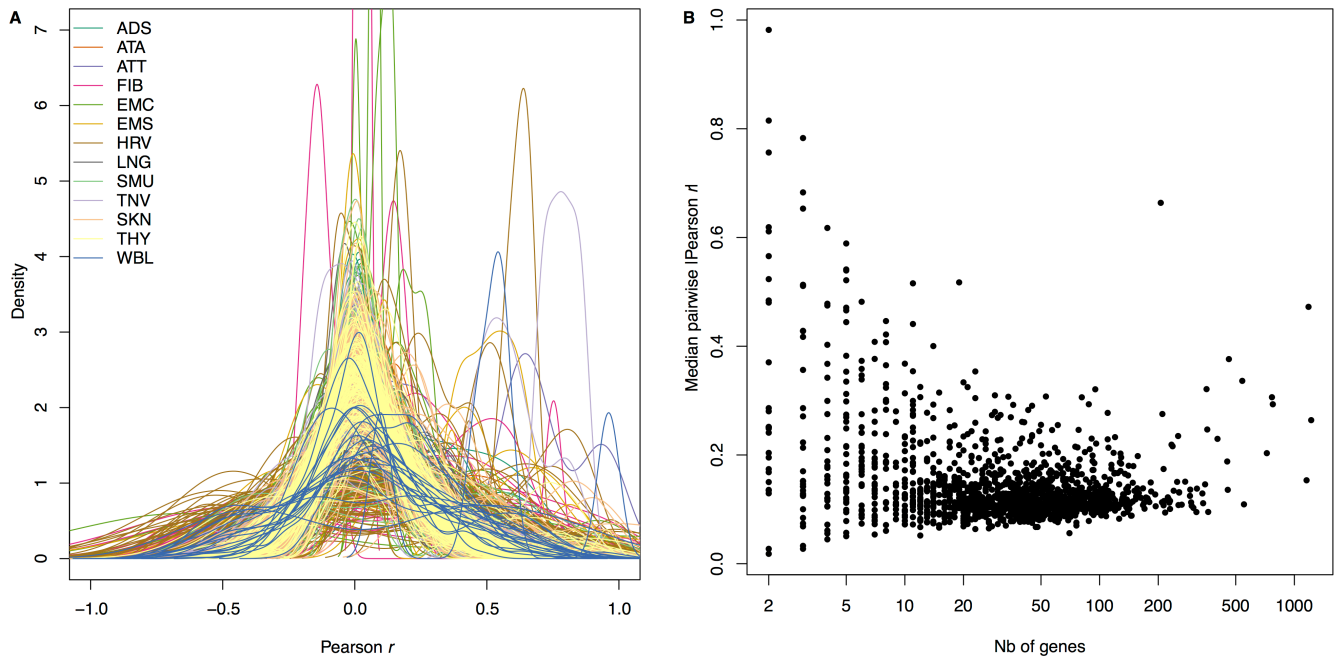

**Figure S5:** Gene expression correlation within communities. **A.** Distribution of pairwise Pearson correlation coefficients between gene expression levels for each community and each tissue. **B.** Distribution of median of  $|\text{Pearson } r|$  in function of the community size, expressed in number of genes.

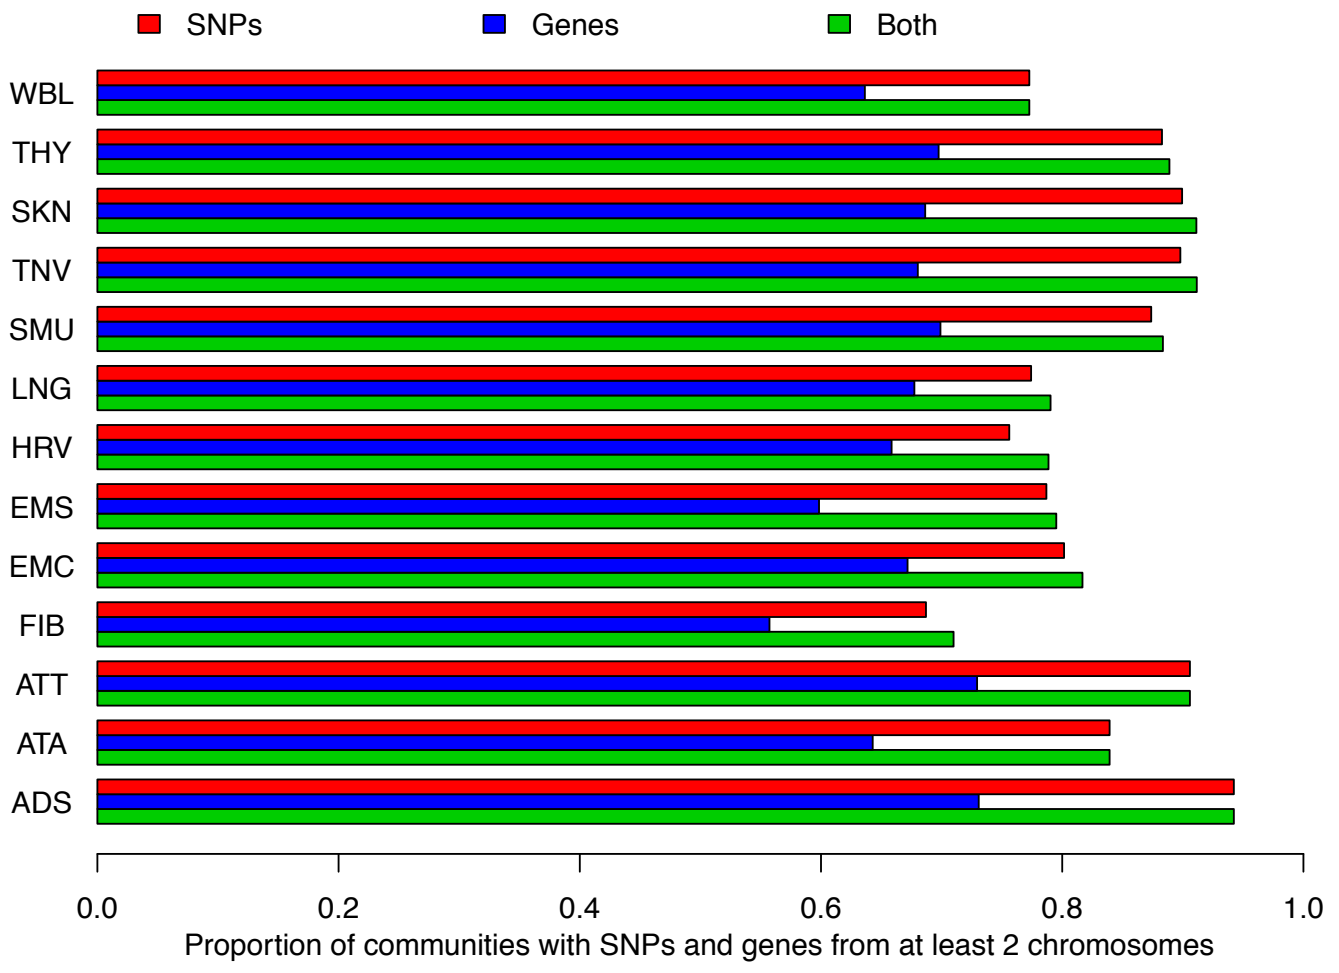

**Figure S6:** Proportion of communities with SNPs, genes or both mapping to at least two chromosomes.

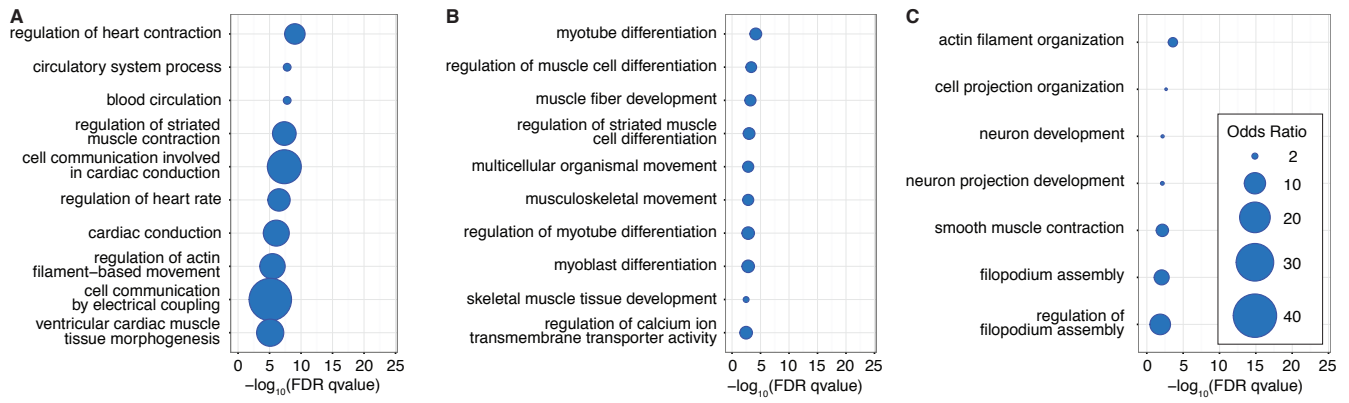

**Figure S7:** Enrichment in muscle-specific gene ontology terms of 3 communities. **A.** Heart left ventricle community 30 is enriched for genes involved in cardiac muscle development and contraction. **B.** Muscle skeletal community 75 is enriched for genes involved in striated muscle development. **C.** Esophagus muscularis community 83 is enriched for genes involved in smooth muscle contraction.



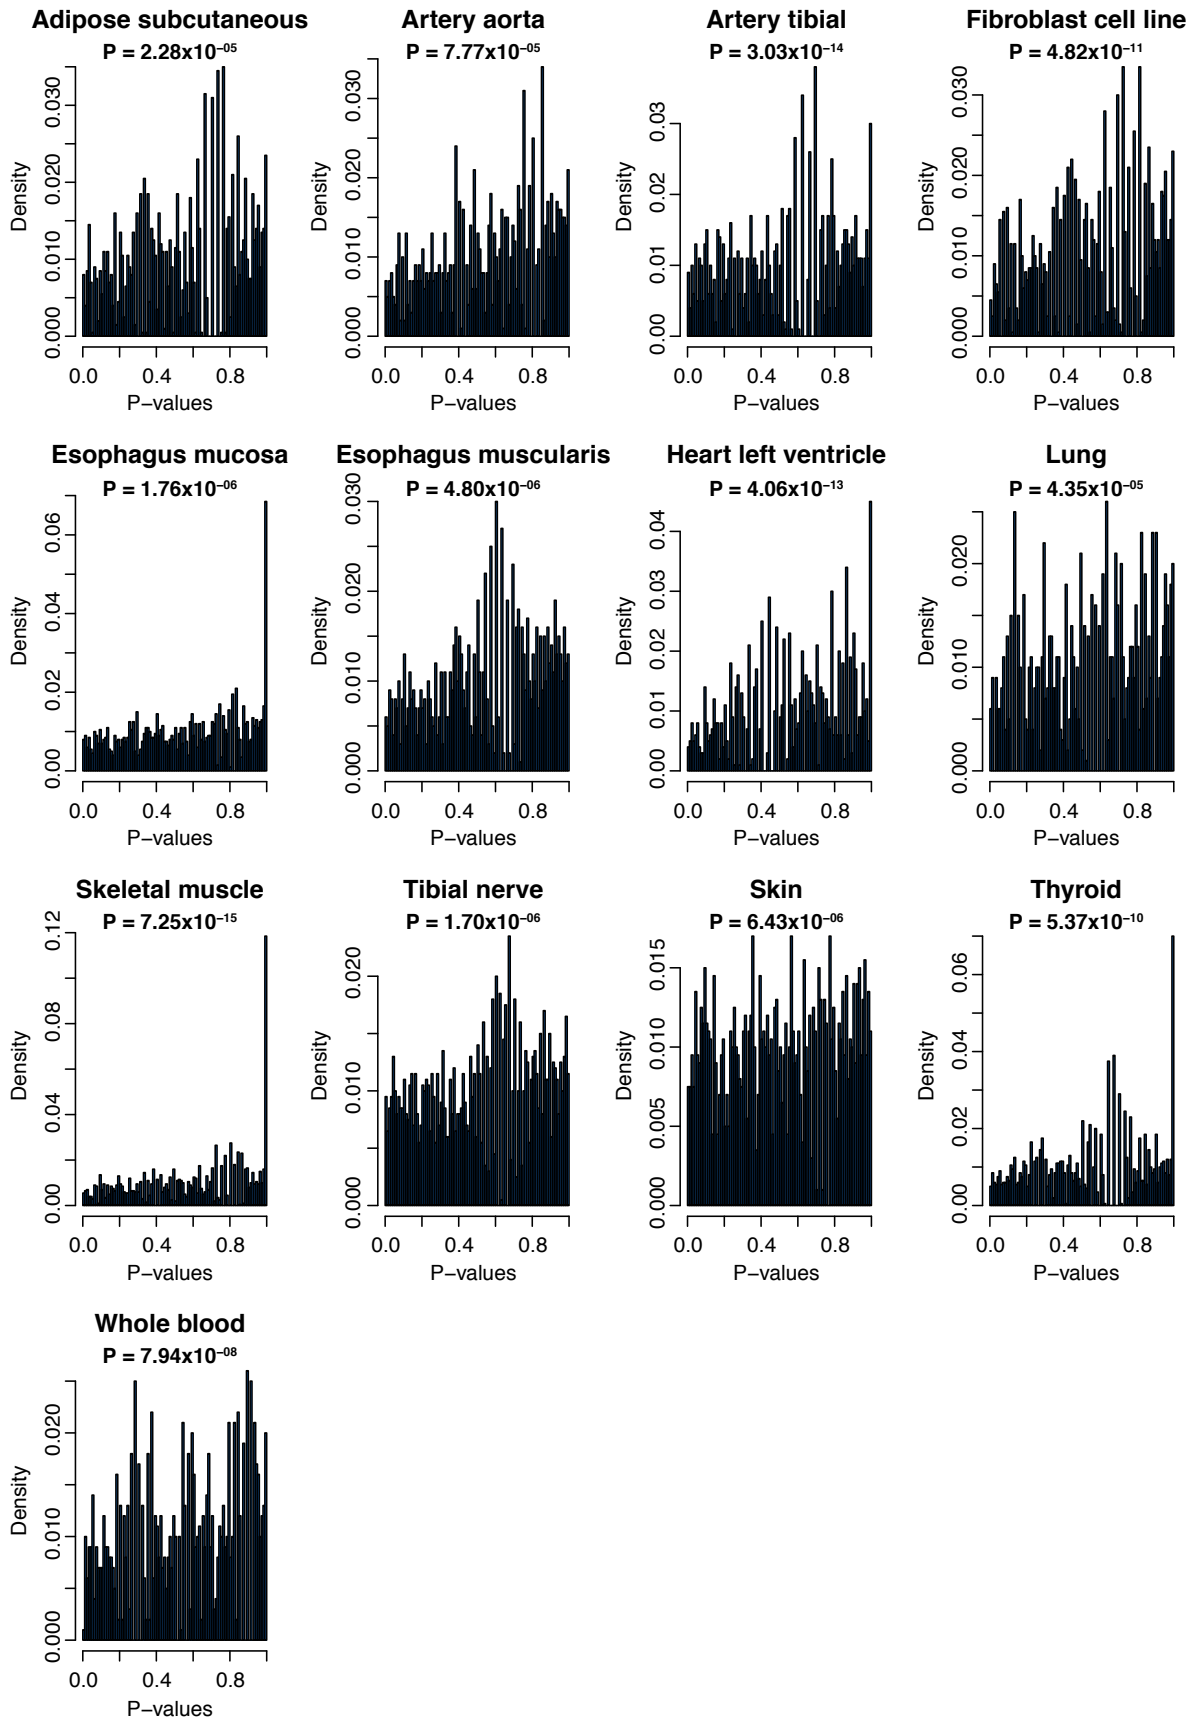

**Figure S8:** Null distribution of p-values for shared GO Term GO:0010468 – regulation of gene expression – obtained using 1000 resamplings. For each tissue, true p-values are written on top of each panel.

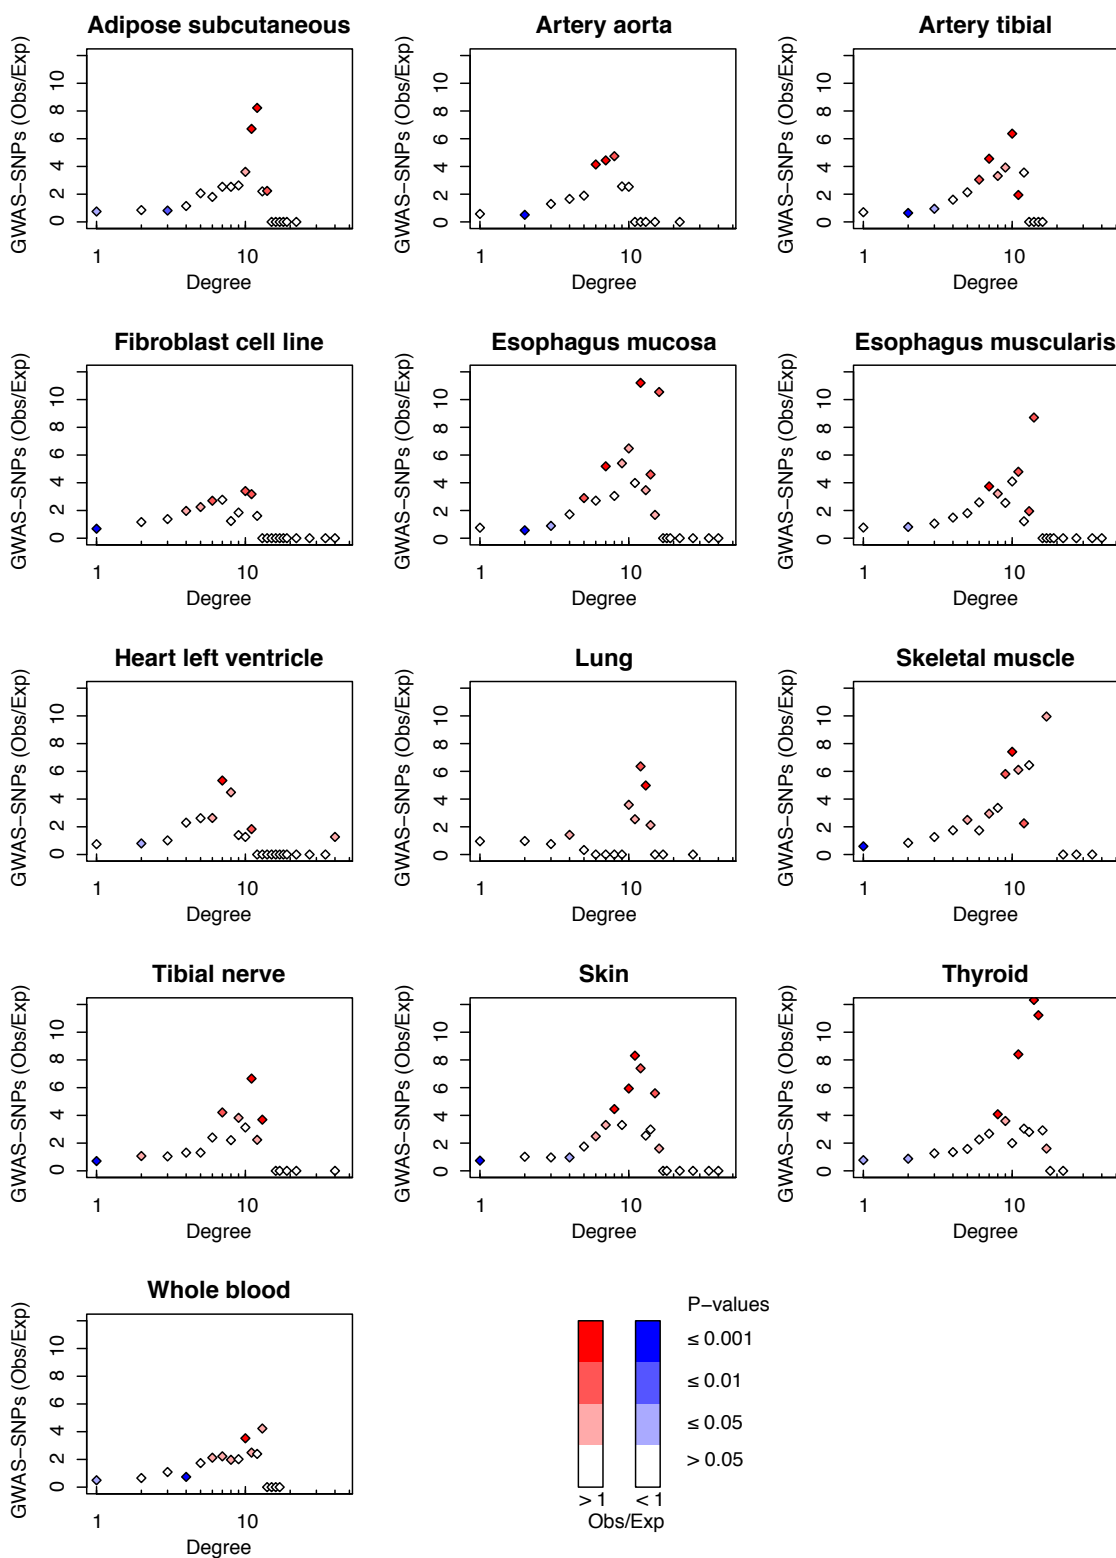

**Figure S9:** Ratio of observed vs. expected number of SNPs associated with all traits or diseases by GWAS studies depending on their network degree for each tissue-specific network.

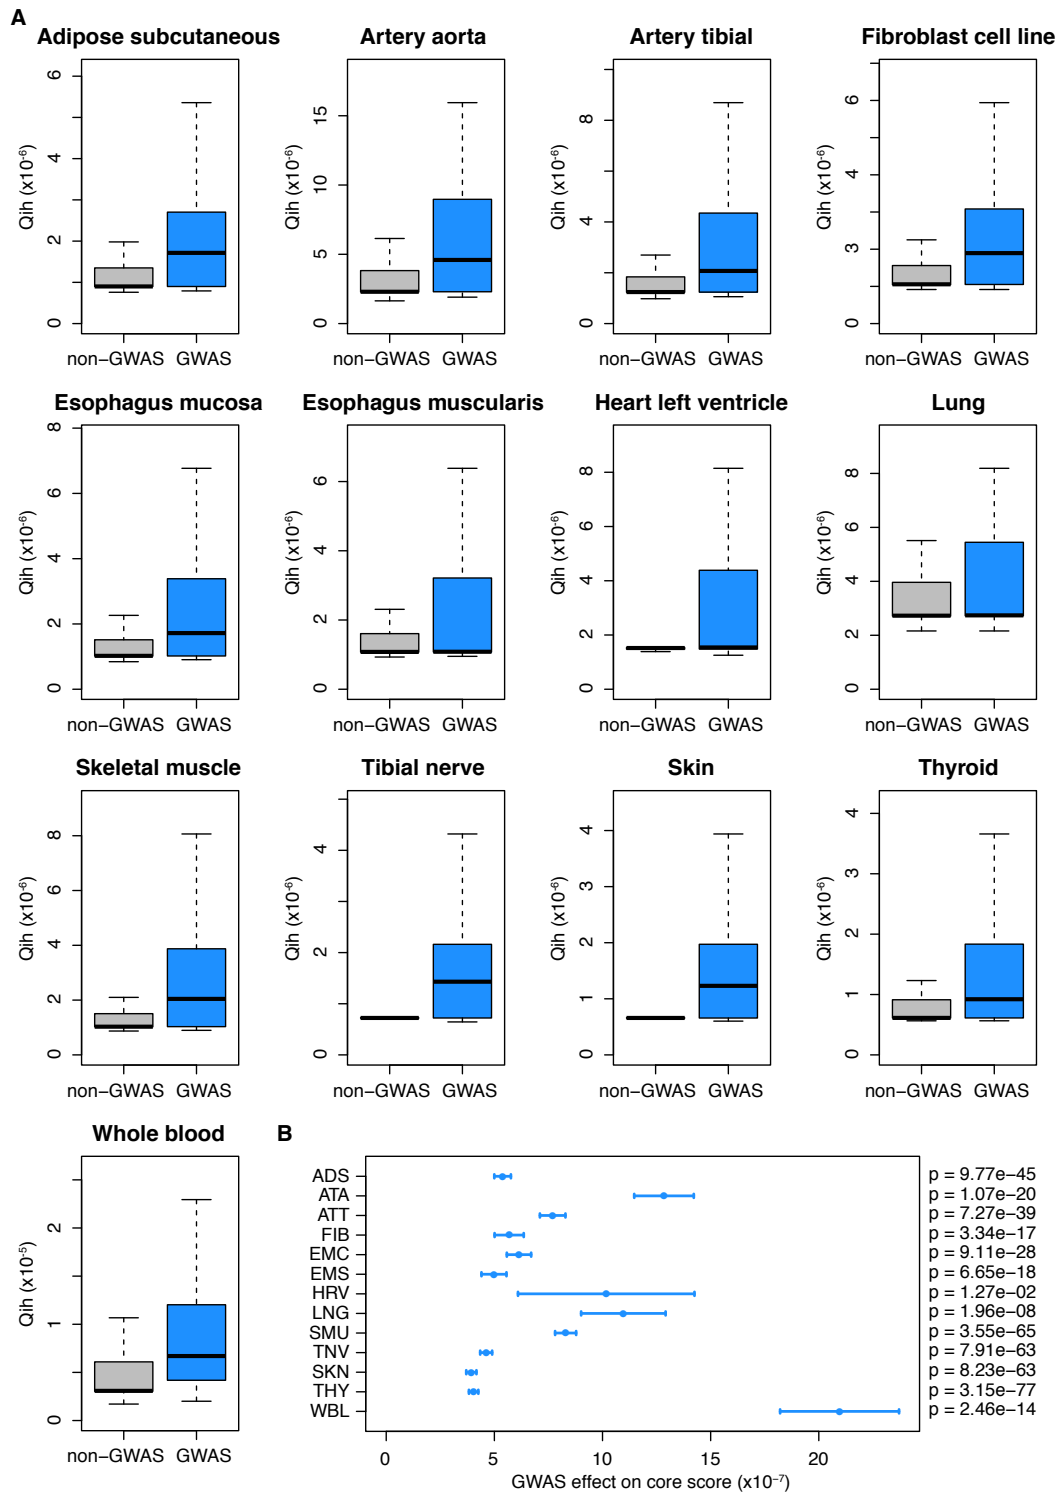

**Figure S10:** GWAS-SNPs are enriched in high core score. **A.** Distribution of core-scores for SNPs associated (in blue) or not (in gray) to traits or diseases by GWAS studies for all tissues. **B.** Coefficient for the GWAS term in the linear regression model (Eq. 4). Bars indicate the standard error for the coefficient. *P*-values indicated on the right were obtained using the likelihood ratio test described in the Methods.

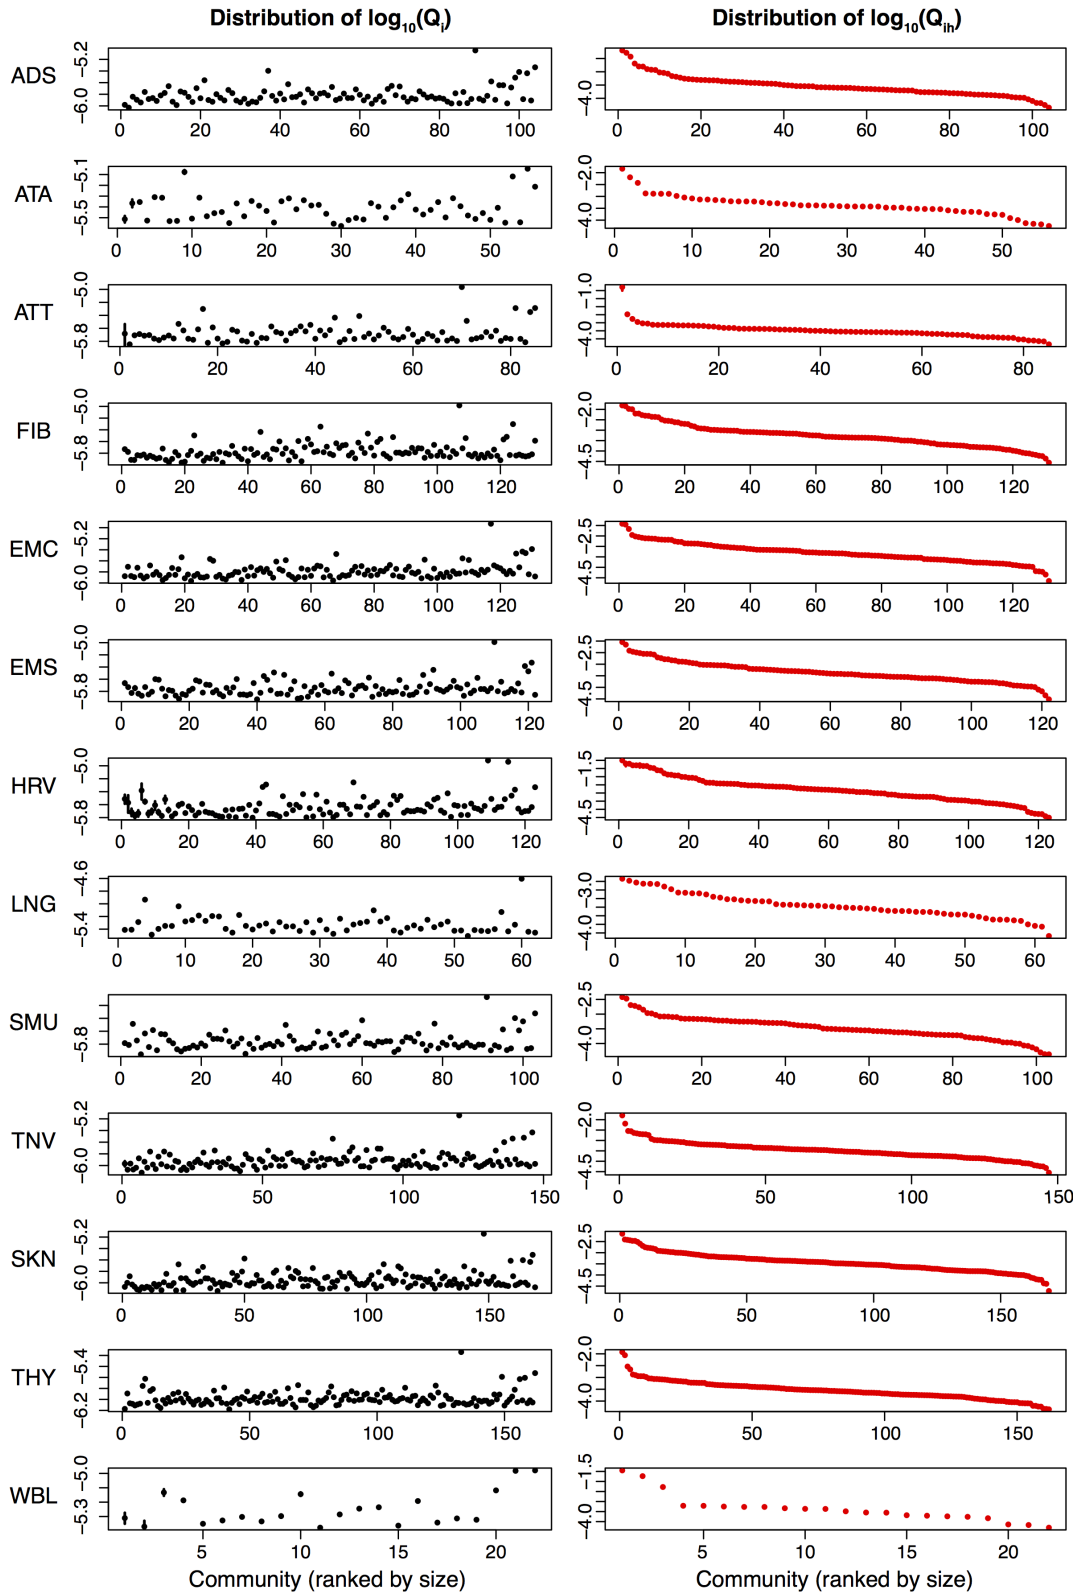

**Figure S11:** Distribution of  $Q_i$  and  $Q_{ih}$  in function of community size. Points represent the mean and bars indicates standard errors for each community.

## SI Tables

**Table S1:** Summary of data: tissues and number of samples.

| Tissue names         | Abbreviation | GTEX tissues                         | Samples |
|----------------------|--------------|--------------------------------------|---------|
| Adipose subcutaneous | ADS          | Adipose - Subcutaneous               | 313     |
| Aorta                | ATA          | Artery - Aorta                       | 216     |
| Artery tibial        | ATT          | Artery - Tibial                      | 303     |
| Fibroblast           | FIB          | Skin cells - Transformed fibroblasts | 291     |
| Esophagus mucosa     | EMC          | Esophagus - Mucosa                   | 276     |
| Esophagus muscularis | EMS          | Esophagus - Muscularis               | 245     |
| Heart left ventricle | HRV          | Heart - Left ventricle               | 212     |
| Lung                 | LNG          | Lung                                 | 290     |
| Skeletal muscle      | SMU          | Muscle - Skeletal                    | 378     |
| Tibial nerve         | TNV          | Nerve - Tibial                       | 278     |
| Skin                 | SKN          | Skin - Not sun exposed (Suprapubic)  | 127     |
|                      |              | Skin - Sun exposed (Lower leg)       | 243     |
|                      |              | Total                                | 370     |
| Thyroid              | THY          | Thyroid                              | 295     |
| Whole blood          | WBL          | Whole blood                          | 365     |

**Table S2:** Comparison of our results (at a FDR  $< 0.05$ ) with GTEX *cis-eQTL* list.

| Tissue names         | GTEX      | Our analysis | Common eQTLs | Proportion |
|----------------------|-----------|--------------|--------------|------------|
| Adipose subcutaneous | 1,311,216 | 599,385      | 445,659      | 74.35%     |
| Artery aorta         | 878,091   | 446,775      | 313,000      | 70.06%     |
| Artery tibial        | 1,245,107 | 520,345      | 388,842      | 74.73%     |
| Fibroblast cell line | 1,315,975 | 438,548      | 330,338      | 75.33%     |
| Esophagus mucosa     | 1,118,435 | 484,212      | 350,936      | 72.48%     |
| Esophagus muscularis | 1,019,564 | 481,827      | 339,745      | 70.51%     |
| Heart left ventricle | 620,472   | 285,283      | 201,318      | 70.57%     |
| Lung                 | 1,095,502 | 483,266      | 355,454      | 73.55%     |
| Skeletal muscle      | 1,124,399 | 523,434      | 382,387      | 73.05%     |
| Tibial nerve         | 1,491,673 | 630,254      | 466,921      | 74.08%     |
| Skin                 | 1,450,025 | 617,307      | 445,664      | 72.19%     |
| Thyroid              | 1,592,982 | 691,333      | 525,681      | 76.04%     |
| Whole blood          | 1,060,536 | 397,941      | 298,012      | 74.89%     |
